# Supplementary material
Source: PubMed Central journal article supplement (PMC1560042)
Supplement: rspb20053304s02.pdf [file rspb20053304s02.pdf]

# Mitosis, stature, and evolution of plant mating systems: Low- $\Phi$ and high- $\Phi$ plants

Douglas G. Scofield \*

Stewart T. Schultz

\* E-mail for correspondence: [scofield@bio.indiana.edu](mailto:scofield@bio.indiana.edu)

## Electronic Appendix, Table 1: $F$ vs. $S$ for small- and large-statured plants

The following table contains the adult inbreeding coefficient  $F$  and progeny selfing rate  $S$  for populations of small-statured (= low- $\Phi$ ) and large-statured (= high- $\Phi$ ) plants gathered under the conditions described in Methods. The large-statured species have been further assigned a height class based on a typical height at maturity of  $\leq 20$  m or  $> 20$  m, as determined from a wide variety of formal and informal published and web-based resources. Where a species has multiple entries in the table, each entry represents estimates of  $F$  and  $S$  from a separate population with each population fitting the criteria described in Methods. These data are displayed in Figure 1*a* for short-statured species and Figure 1*b* for large-statured species.

Electronic Appendix, Table 1:  $F$  and  $S$  for populations of short- and long-lived plants.

| Species                       | Family        | Stature            | $F$    | $S$   | Reference                  |
|-------------------------------|---------------|--------------------|--------|-------|----------------------------|
| <i>Abies lasiocarpa</i>       | Pinaceae      | large, $\leq 20$ m | -0.107 | 0.060 | Shea 1987                  |
| <i>Abies lasiocarpa</i>       | Pinaceae      | large, $\leq 20$ m | -0.097 | 0.350 | Shea 1987                  |
| <i>Aegiceras corniculatum</i> | Myrsinaceae   | large, $\leq 20$ m | 0.045  | 0.347 | Ge & Sun 1999              |
| <i>Amsinckia douglasiana</i>  | Boraginaceae  | small              | 0.032  | 0.420 | Johnston & Schoen 1996     |
| <i>Amsinckia douglasiana</i>  | Boraginaceae  | small              | 0.047  | 0.250 | Johnston & Schoen 1996     |
| <i>Amsinckia gloriosa</i>     | Boraginaceae  | small              | 0.730  | 0.999 | Johnston & Schoen 1996     |
| <i>Amsinckia gloriosa</i>     | Boraginaceae  | small              | 0.740  | 0.997 | Johnston & Schoen 1996     |
| <i>Amsinckia spectabilis</i>  | Boraginaceae  | small              | 0.036  | 0.730 | Johnston & Schoen 1996     |
| <i>Amsinckia spectabilis</i>  | Boraginaceae  | small              | 0.170  | 0.550 | Johnston & Schoen 1996     |
| <i>Amsinckia spectabilis</i>  | Boraginaceae  | small              | 0.350  | 0.330 | Johnston & Schoen 1996     |
| <i>Amsinckia spectabilis</i>  | Boraginaceae  | small              | 1.000  | 0.998 | Johnston & Schoen 1996     |
| <i>Aquilegia caerulea</i>     | Ranunculaceae | small              | 0.336  | 0.531 | Brunet & Eckert 1998       |
| <i>Aquilegia canadensis</i>   | Ranunculaceae | small              | 0.002  | 0.340 | Routley <i>et al.</i> 1999 |
| <i>Aquilegia canadensis</i>   | Ranunculaceae | small              | 0.060  | 0.840 | Routley <i>et al.</i> 1999 |
| <i>Aquilegia canadensis</i>   | Ranunculaceae | small              | 0.090  | 0.600 | Routley <i>et al.</i> 1999 |
| <i>Aquilegia canadensis</i>   | Ranunculaceae | small              | 0.220  | 0.550 | Routley <i>et al.</i> 1999 |
| <i>Aquilegia canadensis</i>   | Ranunculaceae | small              | 0.240  | 0.740 | Routley <i>et al.</i> 1999 |
| <i>Aquilegia canadensis</i>   | Ranunculaceae | small              | 0.290  | 0.980 | Routley <i>et al.</i> 1999 |

Electronic Appendix, Table 1:  $F$  and  $S$  for populations of short- and long-lived plants (continued).

| Species                          | Family        | Stature            | $F$    | $S$   | Reference                              |
|----------------------------------|---------------|--------------------|--------|-------|----------------------------------------|
| <i>Aquilegia canadensis</i>      | Ranunculaceae | small              | 0.310  | 0.970 | Routley <i>et al.</i> 1999             |
| <i>Aquilegia canadensis</i>      | Ranunculaceae | small              | 0.360  | 0.890 | Routley <i>et al.</i> 1999             |
| <i>Aquilegia canadensis</i>      | Ranunculaceae | small              | 0.420  | 0.170 | Routley <i>et al.</i> 1999             |
| <i>Aquilegia canadensis</i>      | Ranunculaceae | small              | 0.600  | 1.000 | Routley <i>et al.</i> 1999             |
| <i>Ardisia escallonioides</i>    | Myrsinaceae   | large, $\leq 20$ m | -0.253 | 0.532 | Pascarella 1997                        |
| <i>Ardisia escallonioides</i>    | Myrsinaceae   | large, $\leq 20$ m | -0.207 | 0.610 | Pascarella 1997                        |
| <i>Begonia socotrana</i>         | Begoniaceae   | small              | -0.064 | 0.175 | Hughes <i>et al.</i> 2003              |
| <i>Beilschmedia pendula</i>      | Lauraceae     | large, $> 20$ m    | -0.300 | 0.082 | Murawski & Hamrick 1991; Murawski 1995 |
| <i>Bertholletia excelsa</i>      | Lecythidaceae | large, $> 20$ m    | -0.207 | 0.151 | O'Malley <i>et al.</i> 1988            |
| <i>Brosimum alicastrum</i>       | Moraceae      | large, $> 20$ m    | -0.271 | 0.125 | Murawski & Hamrick 1991; Murawski 1995 |
| <i>Carapa procera</i>            | Meliaceae     | large, $> 20$ m    | 0.040  | 0.220 | Doligez & Joly 1997                    |
| <i>Cavanillesia platanifolia</i> | Bombacaceae   | large, $> 20$ m    | -0.198 | 0.431 | Murawski <i>et al.</i> 1990            |
| <i>Ceiba pentandra</i>           | Bombacaceae   | large, $> 20$ m    | -0.297 | 0.311 | Murawski & Hamrick 1992; Murawski 1995 |
| <i>Decodon verticillatus</i>     | Lythraceae    | small              | -0.150 | 0.210 | Eckert & Barrett 1994                  |
| <i>Decodon verticillatus</i>     | Lythraceae    | small              | -0.127 | 0.370 | Eckert & Barrett 1994                  |
| <i>Decodon verticillatus</i>     | Lythraceae    | small              | -0.119 | 0.310 | Eckert & Barrett 1994                  |
| <i>Decodon verticillatus</i>     | Lythraceae    | small              | -0.105 | 0.260 | Eckert & Barrett 1994                  |
| <i>Decodon verticillatus</i>     | Lythraceae    | small              | -0.039 | 0.390 | Eckert & Barrett 1994                  |

Electronic Appendix, Table 1:  $F$  and  $S$  for populations of short- and long-lived plants (continued).

| Species                         | Family        | Stature       | $F$    | $S$   | Reference                   |
|---------------------------------|---------------|---------------|--------|-------|-----------------------------|
| <i>Decodon verticillatus</i>    | Lythraceae    | small         | 0.003  | 0.400 | Eckert & Barrett 1994       |
| <i>Decodon verticillatus</i>    | Lythraceae    | small         | 0.007  | 0.230 | Eckert & Barrett 1994       |
| <i>Decodon verticillatus</i>    | Lythraceae    | small         | 0.021  | 0.130 | Eckert & Barrett 1994       |
| <i>Decodon verticillatus</i>    | Lythraceae    | small         | 0.025  | 0.390 | Eckert & Barrett 1994       |
| <i>Decodon verticillatus</i>    | Lythraceae    | small         | 0.081  | 0.320 | Eckert & Barrett 1994       |
| <i>Delphinium barbeyi</i>       | Ranunculaceae | small         | 0.000  | 0.446 | Williams <i>et al.</i> 2001 |
| <i>Delphinium nuttalianum</i>   | Ranunculaceae | small         | 0.000  | 0.027 | Williams <i>et al.</i> 2001 |
| <i>Delphinium nuttalianum</i>   | Ranunculaceae | small         | 0.025  | 0.120 | Williams <i>et al.</i> 2001 |
| <i>Delphinium nuttalianum</i>   | Ranunculaceae | small         | 0.090  | 0.065 | Williams <i>et al.</i> 2001 |
| <i>Delphinium nuttalianum</i>   | Ranunculaceae | small         | 0.117  | 0.084 | Williams <i>et al.</i> 2001 |
| <i>Enterolobium cyclocarpum</i> | Mimosoidea    | large, > 20 m | 0.000  | 0.087 | Rocha & Aguilar 2001        |
| <i>Eriogonum ovalifolium</i>    | Polygonaceae  | large, ≤ 20 m | -0.500 | 0.170 | Neel <i>et al.</i> 2001     |
| <i>Eriogonum ovalifolium</i>    | Polygonaceae  | large, ≤ 20 m | -0.190 | 0.190 | Neel <i>et al.</i> 2001     |
| <i>Eriogonum ovalifolium</i>    | Polygonaceae  | large, ≤ 20 m | -0.100 | 0.150 | Neel <i>et al.</i> 2001     |
| <i>Eriogonum ovalifolium</i>    | Polygonaceae  | large, ≤ 20 m | -0.060 | 0.320 | Neel <i>et al.</i> 2001     |
| <i>Eriogonum ovalifolium</i>    | Polygonaceae  | large, ≤ 20 m | 0.120  | 0.110 | Neel <i>et al.</i> 2001     |
| <i>Eriogonum ovalifolium</i>    | Polygonaceae  | large, ≤ 20 m | 0.350  | 0.260 | Neel <i>et al.</i> 2001     |
| <i>Eucalyptus marginata</i>     | Myrtaceae     | large, > 20 m | -0.570 | 0.080 | Millar <i>et al.</i> 2000   |

Electronic Appendix, Table 1:  $F$  and  $S$  for populations of short- and long-lived plants (continued).

| Species                     | Family        | Stature            | $F$    | $S$   | Reference                    |
|-----------------------------|---------------|--------------------|--------|-------|------------------------------|
| <i>Eucalyptus marginata</i> | Myrtaceae     | large, > 20 m      | -0.360 | 0.290 | Millar <i>et al.</i> 2000    |
| <i>Eucalyptus marginata</i> | Myrtaceae     | large, > 20 m      | -0.340 | 0.200 | Millar <i>et al.</i> 2000    |
| <i>Eucalyptus marginata</i> | Myrtaceae     | large, > 20 m      | -0.140 | 0.190 | Millar <i>et al.</i> 2000    |
| <i>Eucalyptus rhodantha</i> | Myrtaceae     | large, $\leq$ 20 m | -0.120 | 0.330 | Sampson <i>et al.</i> 1989   |
| <i>Eucalyptus rhodantha</i> | Myrtaceae     | large, $\leq$ 20 m | -0.120 | 0.410 | Sampson <i>et al.</i> 1989   |
| <i>Gilia achilleifolia</i>  | Polemoniaceae | small              | 0.050  | 0.710 | Schoen 1982                  |
| <i>Gilia achilleifolia</i>  | Polemoniaceae | small              | 0.100  | 0.580 | Schoen 1982                  |
| <i>Gilia achilleifolia</i>  | Polemoniaceae | small              | 0.200  | 0.200 | Schoen 1982                  |
| <i>Gilia achilleifolia</i>  | Polemoniaceae | small              | 0.220  | 0.360 | Schoen 1982                  |
| <i>Gilia achilleifolia</i>  | Polemoniaceae | small              | 0.470  | 0.850 | Schoen 1982                  |
| <i>Glycine argyrea</i>      | Papilionoidea | small              | 0.130  | 0.530 | Schoen & Brown 1991          |
| <i>Glycine clandestina</i>  | Papilionoidea | small              | 0.380  | 0.560 | Schoen & Brown 1991          |
| <i>Glycine clandestina</i>  | Papilionoidea | small              | 0.730  | 0.890 | Schoen & Brown 1991          |
| <i>Helianthus annuus</i>    | Asteraceae    | small              | -0.200 | 0.400 | Ellstrand <i>et al.</i> 1978 |
| <i>Helianthus annuus</i>    | Asteraceae    | small              | -0.190 | 0.140 | Ellstrand <i>et al.</i> 1978 |
| <i>Helianthus annuus</i>    | Asteraceae    | small              | -0.190 | 0.210 | Ellstrand <i>et al.</i> 1978 |
| <i>Helianthus annuus</i>    | Asteraceae    | small              | -0.180 | 0.230 | Ellstrand <i>et al.</i> 1978 |
| <i>Helianthus annuus</i>    | Asteraceae    | small              | -0.150 | 0.210 | Ellstrand <i>et al.</i> 1978 |

Electronic Appendix, Table 1:  $F$  and  $S$  for populations of short- and long-lived plants (continued).

| Species                                   | Family           | Stature            | $F$    | $S$   | Reference                      |
|-------------------------------------------|------------------|--------------------|--------|-------|--------------------------------|
| <i>Helianthus annuus</i>                  | Asteraceae       | small              | -0.120 | 0.090 | Ellstrand <i>et al.</i> 1978   |
| <i>Helianthus annuus</i>                  | Asteraceae       | small              | -0.090 | 0.250 | Ellstrand <i>et al.</i> 1978   |
| <i>Helianthus annuus</i>                  | Asteraceae       | small              | -0.060 | 0.330 | Ellstrand <i>et al.</i> 1978   |
| <i>Helianthus annuus</i>                  | Asteraceae       | small              | 0.030  | 0.460 | Ellstrand <i>et al.</i> 1978   |
| <i>Helianthus annuus</i>                  | Asteraceae       | small              | 0.050  | 0.190 | Ellstrand <i>et al.</i> 1978   |
| <i>Helianthus annuus</i>                  | Asteraceae       | small              | 0.050  | 0.260 | Ellstrand <i>et al.</i> 1978   |
| <i>Helicteres brevispira</i>              | Sterculiaceae    | large, $\leq 20$ m | -0.268 | 0.354 | Franceschinelli & Bawa 2000    |
| <i>Helicteres brevispira</i>              | Sterculiaceae    | large, $\leq 20$ m | -0.233 | 0.510 | Franceschinelli & Bawa 2000    |
| <i>Helicteres brevispira</i>              | Sterculiaceae    | large, $\leq 20$ m | 0.003  | 0.324 | Franceschinelli & Bawa 2000    |
| <i>Helicteres brevispira</i>              | Sterculiaceae    | large, $\leq 20$ m | 0.049  | 0.522 | Franceschinelli & Bawa 2000    |
| <i>Intsia palembanica</i>                 | Caesalpinioideae | large, $> 20$ m    | -0.071 | 0.234 | Lee <i>et al.</i> 2002         |
| <i>Kandelia candel</i>                    | Rhizophoraceae   | large, $\leq 20$ m | -0.170 | 0.203 | Sun <i>et al.</i> 1998         |
| <i>Kandelia candel</i>                    | Rhizophoraceae   | large, $\leq 20$ m | 0.112  | 0.303 | Sun <i>et al.</i> 1998         |
| <i>Larix decidua</i>                      | Pinaceae         | large, $> 20$ m    | 0.021  | 0.325 | Lewandowski & Burczyk 2000     |
| <i>Larix decidua</i> ssp. <i>polonica</i> | Pinaceae         | large, $> 20$ m    | -0.057 | 0.057 | Lewandowski <i>et al.</i> 1991 |
| <i>Leucochrysum albicans</i>              | Asteraceae       | small              | 0.000  | 0.010 | Costin <i>et al.</i> 2001      |
| <i>Leucochrysum albicans</i>              | Asteraceae       | small              | 0.010  | 0.090 | Costin <i>et al.</i> 2001      |
| <i>Leucochrysum albicans</i>              | Asteraceae       | small              | 0.150  | 0.010 | Costin <i>et al.</i> 2001      |

Electronic Appendix, Table 1:  $F$  and  $S$  for populations of short- and long-lived plants (continued).

| Species                        | Family           | Stature            | $F$    | $S$   | Reference                       |
|--------------------------------|------------------|--------------------|--------|-------|---------------------------------|
| <i>Linanthus bicolor</i>       | Polemoniaceae    | small              | 0.569  | 0.925 | Goodwillie 2000                 |
| <i>Linanthus bicolor</i>       | Polemoniaceae    | small              | 0.944  | 0.999 | Goodwillie 2000                 |
| <i>Linanthus jepsonii</i>      | Polemoniaceae    | small              | 0.048  | 0.700 | Goodwillie 2000                 |
| <i>Linanthus jepsonii</i>      | Polemoniaceae    | small              | 0.152  | 0.859 | Goodwillie 2000                 |
| <i>Linanthus jepsonii</i>      | Polemoniaceae    | small              | 0.292  | 0.896 | Goodwillie 2000                 |
| <i>Liriodendron tulipifera</i> | Magnoliaceae     | large, > 20 m      | -0.050 | 0.139 | Brotschol <i>et al.</i> 1986    |
| <i>Liriodendron tulipifera</i> | Magnoliaceae     | large, > 20 m      | -0.022 | 0.448 | Brotschol <i>et al.</i> 1986    |
| <i>Liriodendron tulipifera</i> | Magnoliaceae     | large, > 20 m      | 0.080  | 0.453 | Brotschol <i>et al.</i> 1986    |
| <i>Lupinus arboreus</i>        | Papilionoidea    | large, $\leq$ 20 m | 0.001  | 0.221 | Kittelton & Maron 2000, 2001    |
| <i>Metrosideros excelsa</i>    | Myrtaceae        | large, $\leq$ 20 m | 0.010  | 0.780 | Schmidt-Adam <i>et al.</i> 2000 |
| <i>Metrosideros excelsa</i>    | Myrtaceae        | large, $\leq$ 20 m | 0.040  | 0.600 | Schmidt-Adam <i>et al.</i> 2000 |
| <i>Metrosideros excelsa</i>    | Myrtaceae        | large, $\leq$ 20 m | 0.060  | 0.500 | Schmidt-Adam <i>et al.</i> 2000 |
| <i>Metrosideros excelsa</i>    | Myrtaceae        | large, $\leq$ 20 m | 0.100  | 0.470 | Schmidt-Adam <i>et al.</i> 2000 |
| <i>Metrosideros excelsa</i>    | Myrtaceae        | large, $\leq$ 20 m | 0.120  | 0.550 | Schmidt-Adam <i>et al.</i> 2000 |
| <i>Mimulus guttatus</i>        | Scrophulariaceae | small              | 0.010  | 0.280 | Ritland & Ganders 1987          |
| <i>Mimulus guttatus</i>        | Scrophulariaceae | small              | 0.114  | 0.615 | Dole & Ritland 1993             |
| <i>Mimulus guttatus</i>        | Scrophulariaceae | small              | 0.172  | 0.568 | Dole & Ritland 1993             |
| <i>Mimulus guttatus</i>        | Scrophulariaceae | small              | 0.200  | 0.570 | Ritland & Ganders 1987          |

Electronic Appendix, Table 1:  $F$  and  $S$  for populations of short- and long-lived plants (continued).

| Species                                         | Family           | Stature            | $F$    | $S$   | Reference                    |
|-------------------------------------------------|------------------|--------------------|--------|-------|------------------------------|
| <i>Mimulus guttatus</i>                         | Scrophulariaceae | small              | 0.210  | 0.360 | Ritland & Ganders 1987       |
| <i>Mimulus guttatus</i>                         | Scrophulariaceae | small              | 0.218  | 0.703 | Dole & Ritland 1993          |
| <i>Mimulus guttatus</i>                         | Scrophulariaceae | small              | 0.300  | 0.480 | Ritland & Ganders 1987       |
| <i>Mimulus guttatus</i>                         | Scrophulariaceae | small              | 0.320  | 0.660 | Ritland & Ganders 1987       |
| <i>Mimulus platycalix</i>                       | Scrophulariaceae | small              | 0.497  | 0.814 | Dole & Ritland 1993          |
| <i>Mimulus platycalix</i>                       | Scrophulariaceae | small              | 0.533  | 0.797 | Dole & Ritland 1993          |
| <i>Mimulus platycalix</i>                       | Scrophulariaceae | small              | 0.599  | 0.922 | Dole & Ritland 1993          |
| $\infty$ <i>Neobalanocarpus heimii</i>          | Dipterocarpaceae | large, > 20 m      | 0.129  | 0.110 | Konuma <i>et al.</i> 2000    |
| <i>Ophiopogon xylorrhizus</i>                   | Liliaceae        | small              | 0.140  | 0.533 | He <i>et al.</i> 1998        |
| <i>Ophiopogon xylorrhizus</i>                   | Liliaceae        | small              | 0.287  | 0.677 | He <i>et al.</i> 1998        |
| <i>Ophiopogon xylorrhizus</i>                   | Liliaceae        | small              | 0.374  | 0.909 | He <i>et al.</i> 1998        |
| <i>Phaseolus coccineus</i> ssp. <i>formosus</i> | Papilionoidea    | small              | 0.200  | 0.307 | Escalante <i>et al.</i> 1994 |
| <i>Phaseolus coccineus</i> ssp. <i>formosus</i> | Papilionoidea    | small              | 0.258  | 0.338 | Escalante <i>et al.</i> 1994 |
| <i>Picea chihuahuana</i>                        | Pinaceae         | large, > 20 m      | -0.042 | 0.850 | Ledig <i>et al.</i> 1997     |
| <i>Picea chihuahuana</i>                        | Pinaceae         | large, > 20 m      | 0.414  | 1.000 | Ledig <i>et al.</i> 1997     |
| <i>Picea engelmannii</i>                        | Pinaceae         | large, $\leq$ 20 m | -0.074 | 0.080 | Shea 1987                    |
| <i>Picea engelmannii</i>                        | Pinaceae         | large, $\leq$ 20 m | -0.056 | 0.040 | Shea 1987                    |
| <i>Picea mariana</i>                            | Pinaceae         | large, > 20 m      | -0.042 | 0.109 | Boyle & Morgenstern 1986     |



Electronic Appendix, Table 1:  $F$  and  $S$  for populations of short- and long-lived plants (continued).

| Species                                       | Family   | Stature            | $F$    | $S$   | Reference                   |
|-----------------------------------------------|----------|--------------------|--------|-------|-----------------------------|
| <i>Picea mariana</i>                          | Pinaceae | large, > 20 m      | -0.041 | 0.098 | Boyle & Morgenstern 1986    |
| <i>Picea mariana</i>                          | Pinaceae | large, > 20 m      | -0.032 | 0.048 | Boyle & Morgenstern 1986    |
| <i>Picea mariana</i>                          | Pinaceae | large, > 20 m      | -0.029 | 0.109 | Boyle & Morgenstern 1986    |
| <i>Picea mariana</i>                          | Pinaceae | large, > 20 m      | 0.033  | 0.067 | Boyle & Morgenstern 1986    |
| <i>Picea mariana</i>                          | Pinaceae | large, > 20 m      | 0.037  | 0.374 | Sproule & Dancik 1996       |
| <i>Picea mariana</i>                          | Pinaceae | large, > 20 m      | 0.054  | 0.024 | Boyle & Morgenstern 1986    |
| <i>Picea mariana</i>                          | Pinaceae | large, > 20 m      | 0.160  | 0.384 | Sproule & Dancik 1996       |
| <i>Picea martinicensis</i>                    | Pinaceae | large, > 20 m      | -0.058 | 0.601 | Ledig <i>et al.</i> 2000    |
| <i>Picea martinicensis</i>                    | Pinaceae | large, > 20 m      | 0.121  | 0.315 | Ledig <i>et al.</i> 2000    |
| <i>Picea omorika</i>                          | Pinaceae | large, > 20 m      | 0.110  | 0.160 | Kuittinen & Savolainen 1992 |
| <i>Pinus caribaea</i> var. <i>bahamensis</i>  | Pinaceae | large, > 20 m      | 0.115  | 0.150 | Matheson <i>et al.</i> 1989 |
| <i>Pinus caribaea</i> var. <i>bahamensis</i>  | Pinaceae | large, > 20 m      | 0.160  | 0.070 | Matheson <i>et al.</i> 1989 |
| <i>Pinus caribaea</i> var. <i>hondurensis</i> | Pinaceae | large, > 20 m      | 0.148  | 0.080 | Matheson <i>et al.</i> 1989 |
| <i>Pinus caribaea</i> var. <i>hondurensis</i> | Pinaceae | large, > 20 m      | 0.172  | 0.110 | Matheson <i>et al.</i> 1989 |
| <i>Pinus cembra</i>                           | Pinaceae | large, > 20 m      | 0.014  | 0.192 | Lewandowski & Burczyk 2000  |
| <i>Pinus contorta</i> ssp. <i>latifolia</i>   | Pinaceae | large, > 20 m      | 0.022  | 0.050 | Epperson & Allard 1984      |
| <i>Pinus leucodermis</i>                      | Pinaceae | large, $\leq$ 20 m | -0.089 | 0.176 | Morgante <i>et al.</i> 1993 |
| <i>Pinus leucodermis</i>                      | Pinaceae | large, $\leq$ 20 m | -0.069 | 0.277 | Morgante <i>et al.</i> 1993 |

Electronic Appendix, Table 1:  $F$  and  $S$  for populations of short- and long-lived plants (continued).

| Species                | Family   | Stature       | $F$    | $S$   | Reference                     |
|------------------------|----------|---------------|--------|-------|-------------------------------|
| <i>Pinus maximinoi</i> | Pinaceae | large, > 20 m | 0.176  | 0.350 | Matheson <i>et al.</i> 1989   |
| <i>Pinus monticola</i> | Pinaceae | large, > 20 m | -0.105 | 0.023 | El-Kassaby <i>et al.</i> 1987 |
| <i>Pinus oocarpa</i>   | Pinaceae | large, > 20 m | 0.000  | 0.040 | Matheson <i>et al.</i> 1989   |
| <i>Pinus oocarpa</i>   | Pinaceae | large, > 20 m | 0.083  | 0.170 | Matheson <i>et al.</i> 1989   |
| <i>Pinus oocarpa</i>   | Pinaceae | large, > 20 m | 0.176  | 0.170 | Matheson <i>et al.</i> 1989   |
| <i>Pinus oocarpa</i>   | Pinaceae | large, > 20 m | 0.176  | 0.190 | Matheson <i>et al.</i> 1989   |
| <i>Pinus oocarpa</i>   | Pinaceae | large, > 20 m | 0.190  | 0.060 | Matheson <i>et al.</i> 1989   |
| <i>Pinus pinceana</i>  | Pinaceae | large, ≤ 20 m | 0.076  | 0.124 | Ledig <i>et al.</i> 2001      |
| <i>Pinus pinceana</i>  | Pinaceae | large, ≤ 20 m | 0.097  | 0.103 | Ledig <i>et al.</i> 2001      |
| <i>Pinus pinceana</i>  | Pinaceae | large, ≤ 20 m | 0.099  | 0.164 | Ledig <i>et al.</i> 2001      |
| <i>Pinus ponderosa</i> | Pinaceae | large, > 20 m | -0.022 | 0.190 | Farris & Mitton 1984          |
| <i>Pinus strobus</i>   | Pinaceae | large, > 20 m | -0.266 | 0.101 | Rajora <i>et al.</i> 2002     |
| <i>Pinus strobus</i>   | Pinaceae | large, > 20 m | -0.258 | 0.009 | Rajora <i>et al.</i> 2002     |
| <i>Pinus strobus</i>   | Pinaceae | large, > 20 m | -0.255 | 0.084 | Rajora <i>et al.</i> 2002     |
| <i>Pinus strobus</i>   | Pinaceae | large, > 20 m | -0.152 | 0.133 | Rajora <i>et al.</i> 2002     |
| <i>Pinus strobus</i>   | Pinaceae | large, > 20 m | -0.147 | 0.029 | Rajora <i>et al.</i> 2002     |
| <i>Pinus strobus</i>   | Pinaceae | large, > 20 m | -0.113 | 0.020 | Rajora <i>et al.</i> 2002     |
| <i>Pinus strobus</i>   | Pinaceae | large, > 20 m | -0.107 | 0.080 | Rajora <i>et al.</i> 2002     |

Electronic Appendix, Table 1:  $F$  and  $S$  for populations of short- and long-lived plants (continued).

| Species                           | Family        | Stature       | $F$    | $S$   | Reference                     |
|-----------------------------------|---------------|---------------|--------|-------|-------------------------------|
| <i>Pinus strobus</i>              | Pinaceae      | large, > 20 m | -0.083 | 0.121 | Rajora <i>et al.</i> 2002     |
| <i>Pinus strobus</i>              | Pinaceae      | large, > 20 m | 0.035  | 0.111 | Rajora <i>et al.</i> 2002     |
| <i>Pinus sylvestris</i>           | Pinaceae      | large, > 20 m | 0.032  | 0.091 | Kärkkäinen <i>et al.</i> 1996 |
| <i>Pinus washoensis</i>           | Pinaceae      | large, > 20 m | -0.271 | 0.077 | Mitton <i>et al.</i> 1997     |
| <i>Pinus washoensis</i>           | Pinaceae      | large, > 20 m | -0.263 | 0.117 | Mitton <i>et al.</i> 1997     |
| <i>Pinus washoensis</i>           | Pinaceae      | large, > 20 m | -0.156 | 0.117 | Mitton <i>et al.</i> 1997     |
| <i>Pinus washoensis</i>           | Pinaceae      | large, > 20 m | -0.061 | 0.236 | Mitton <i>et al.</i> 1997     |
| <i>Piper amalago</i>              | Piperaceae    | large, ≤ 20 m | 0.124  | 0.422 | Heywood & Fleming 1986        |
| <i>Pithecellobium elegans</i>     | Mimosoidea    | large, > 20 m | -0.055 | 0.030 | Hall <i>et al.</i> 1996       |
| <i>Pithecellobium pedicellare</i> | Mimosoidea    | large, > 20 m | 0.040  | 0.049 | O'Malley & Bawa 1987          |
| <i>Platypodium elegans</i>        | Papilionoidea | large, > 20 m | 0.014  | 0.180 | Hufford & Hamrick 2003        |
| <i>Prosopis alba</i>              | Mimosoidea    | large, ≤ 20 m | 0.008  | 0.282 | Besega <i>et al.</i> 2000     |
| <i>Prosopis chilensis</i>         | Mimosoidea    | large, ≤ 20 m | 0.225  | 0.191 | Besega <i>et al.</i> 2000     |
| <i>Prosopis flexuosa</i>          | Mimosoidea    | large, ≤ 20 m | 0.000  | 0.118 | Besega <i>et al.</i> 2000     |
| <i>Prosopis glandulosa</i>        | Mimosoidea    | large, ≤ 20 m | 0.098  | 0.259 | Besega <i>et al.</i> 2000     |
| <i>Prosopis ruscifolia</i>        | Mimosoidea    | large, ≤ 20 m | 0.022  | 0.024 | Besega <i>et al.</i> 2000     |
| <i>Prosopis velutina</i>          | Mimosoidea    | large, ≤ 20 m | -0.300 | 0.391 | Keys & Smith 1994             |
| <i>Prosopis velutina</i>          | Mimosoidea    | large, ≤ 20 m | -0.049 | 0.340 | Keys & Smith 1994             |

Electronic Appendix, Table 1:  $F$  and  $S$  for populations of short- and long-lived plants (continued).

| Species                        | Family        | Stature            | $F$    | $S$   | Reference                    |
|--------------------------------|---------------|--------------------|--------|-------|------------------------------|
| <i>Prosopis velutina</i>       | Mimosoidea    | large, $\leq 20$ m | 0.022  | 0.218 | Besega <i>et al.</i> 2000    |
| <i>Pseudotsuga menziesii</i>   | Pinaceae      | large, $> 20$ m    | -0.058 | 0.080 | Shaw & Allard 1982b,a        |
| <i>Pseudotsuga menziesii</i>   | Pinaceae      | large, $> 20$ m    | -0.047 | 0.130 | Shaw & Allard 1982b,a        |
| <i>Pseudotsuga menziesii</i>   | Pinaceae      | large, $> 20$ m    | -0.038 | 0.040 | Shaw & Allard 1982b,a        |
| <i>Pseudotsuga menziesii</i>   | Pinaceae      | large, $> 20$ m    | -0.030 | 0.110 | Shaw & Allard 1982b,a        |
| <i>Pseudotsuga menziesii</i>   | Pinaceae      | large, $> 20$ m    | -0.020 | 0.080 | Shaw & Allard 1982b,a        |
| <i>Pseudotsuga menziesii</i>   | Pinaceae      | large, $> 20$ m    | -0.017 | 0.130 | Shaw & Allard 1982b,a        |
| <i>Pseudotsuga menziesii</i>   | Pinaceae      | large, $> 20$ m    | -0.005 | 0.140 | Shaw & Allard 1982b,a        |
| <i>Pseudotsuga menziesii</i>   | Pinaceae      | large, $> 20$ m    | 0.000  | 0.090 | Shaw & Allard 1982b,a        |
| <i>Pterocarpus indicus</i>     | Papilionoidea | large, $> 20$ m    | 0.015  | 0.092 | Finkeldey <i>et al.</i> 1999 |
| <i>Pterocarpus macrocarpus</i> | Papilionoidea | large, $> 20$ m    | -0.457 | 0.249 | Liengsiri <i>et al.</i> 1998 |
| <i>Pterocarpus macrocarpus</i> | Papilionoidea | large, $> 20$ m    | -0.329 | 0.105 | Liengsiri <i>et al.</i> 1998 |
| <i>Pterocarpus macrocarpus</i> | Papilionoidea | large, $> 20$ m    | -0.318 | 0.042 | Liengsiri <i>et al.</i> 1998 |
| <i>Pterocarpus macrocarpus</i> | Papilionoidea | large, $> 20$ m    | -0.316 | 0.041 | Liengsiri <i>et al.</i> 1998 |
| <i>Pterocarpus macrocarpus</i> | Papilionoidea | large, $> 20$ m    | -0.316 | 0.047 | Liengsiri <i>et al.</i> 1998 |
| <i>Pterocarpus macrocarpus</i> | Papilionoidea | large, $> 20$ m    | -0.315 | 0.281 | Liengsiri <i>et al.</i> 1998 |
| <i>Pterocarpus macrocarpus</i> | Papilionoidea | large, $> 20$ m    | -0.312 | 0.053 | Liengsiri <i>et al.</i> 1998 |
| <i>Pterocarpus macrocarpus</i> | Papilionoidea | large, $> 20$ m    | -0.275 | 0.109 | Liengsiri <i>et al.</i> 1998 |

Electronic Appendix, Table 1:  $F$  and  $S$  for populations of short- and long-lived plants (continued).

| Species                           | Family           | Stature            | $F$    | $S$   | Reference                    |
|-----------------------------------|------------------|--------------------|--------|-------|------------------------------|
| <i>Pterocarpus macrocarpus</i>    | Papilionoidea    | large, > 20 m      | -0.228 | 0.102 | Liengsiri <i>et al.</i> 1998 |
| <i>Pterocarpus macrocarpus</i>    | Papilionoidea    | large, > 20 m      | -0.212 | 0.055 | Liengsiri <i>et al.</i> 1998 |
| <i>Pterocarpus macrocarpus</i>    | Papilionoidea    | large, > 20 m      | -0.152 | 0.051 | Liengsiri <i>et al.</i> 1998 |
| <i>Rutidosia leirolepis</i>       | Asteraceae       | small              | 0.070  | 0.110 | Young <i>et al.</i> 2002     |
| <i>Rutidosia leirolepis</i>       | Asteraceae       | small              | 0.210  | 0.170 | Young <i>et al.</i> 2002     |
| <i>Rutidosia leirolepis</i>       | Asteraceae       | small              | 0.220  | 0.070 | Young <i>et al.</i> 2002     |
| <i>Schiedea adamantis</i>         | Caryophyllaceae  | large, $\leq$ 20 m | -0.178 | 0.501 | Sakai <i>et al.</i> 1997     |
| <i>Senecio squulidus</i>          | Asteraceae       | small              | -0.234 | 0.281 | Abbott & Forbes 1993         |
| <i>Senecio squulidus</i>          | Asteraceae       | small              | -0.111 | 0.098 | Abbott & Forbes 1993         |
| <i>Senecio squulidus</i>          | Asteraceae       | small              | 0.086  | 0.022 | Abbott & Forbes 1993         |
| <i>Shorea congestiflora</i>       | Dipterocarpaceae | large, > 20 m      | 0.088  | 0.126 | Murawski <i>et al.</i> 1994b |
| <i>Shorea leprosula</i>           | Dipterocarpaceae | large, > 20 m      | -0.078 | 0.163 | Lee <i>et al.</i> 2000       |
| <i>Shorea megistophylla</i>       | Dipterocarpaceae | large, > 20 m      | -0.247 | 0.263 | Murawski <i>et al.</i> 1994a |
| <i>Shorea trapezifolia</i>        | Dipterocarpaceae | large, > 20 m      | -0.300 | 0.383 | Murawski <i>et al.</i> 1994b |
| <i>Stemonoporus oblongifolius</i> | Dipterocarpaceae | large, $\leq$ 20 m | 0.095  | 0.156 | Murawski & Bawa 1994         |
| <i>Tachigali versicolor</i>       | Papilionoidea    | large, > 20 m      | -0.106 | 0.002 | Loveless <i>et al.</i> 1998  |
| <i>Thuja occidentalis</i>         | Cupressaceae     | large, $\leq$ 20 m | -0.167 | 0.255 | Perry & Knowles 1990         |
| <i>Thuja occidentalis</i>         | Cupressaceae     | large, $\leq$ 20 m | -0.136 | 0.348 | Perry & Knowles 1990         |

Electronic Appendix, Table 1:  $F$  and  $S$  for populations of short- and long-lived plants (continued).

| Species                   | Family       | Stature            | $F$    | $S$   | Reference              |
|---------------------------|--------------|--------------------|--------|-------|------------------------|
| <i>Thuja occidentalis</i> | Cupressaceae | large, $\leq 20$ m | 0.090  | 0.493 | Perry & Knowles 1990   |
| <i>Thuja orientalis</i>   | Cupressaceae | large, $\leq 20$ m | -0.406 | 0.310 | Xie <i>et al.</i> 1991 |
| <i>Thuja orientalis</i>   | Cupressaceae | large, $\leq 20$ m | -0.066 | 0.320 | Xie <i>et al.</i> 1991 |
| <i>Thuja orientalis</i>   | Cupressaceae | large, $\leq 20$ m | -0.049 | 0.190 | Xie <i>et al.</i> 1991 |
| <i>Thuja orientalis</i>   | Cupressaceae | large, $\leq 20$ m | 0.029  | 0.190 | Xie <i>et al.</i> 1991 |

## Electronic Appendix, References

- Abbott, R. J., & Forbes, D. G. 1993. Outcrossing rate and self-incompatibility in the colonizing species *Senecio squalidus*. *Heredity*, **71**, 155–159.
- Besega, C., Ferreyra, L., Julio, N., Montoya, S., Saidman, B., & Vilardi, J. C. 2000. Mating system parameters in species of genus *Prosopis* (Leguminosae). *Hereditas*, **132**(1), 19–27.
- Boyle, T. J. B., & Morgenstern, E. K. 1986. Estimates of outcrossing rates in 6 populations of Black Spruce in central New Brunswick. *Silv. Genet.*, **35**(2-3), 102–106.
- Brotschol, J. V., Roberds, J. H., & Namkoong, G. 1986. Allozyme variation among North Carolina populations of *Liriodendron tulipifera* L. *Silv. Genet.*, **35**(4), 131–138.
- Brunet, J., & Eckert, C. G. 1998. Effects of floral morphology and display on outcrossing in Blue Columbine, *Aquilegia caerulea* (Ranunculaceae). *Func. Ecol.*, **12**(4), 596–606.
- Costin, B. J., Morgan, J. W., & Young, A. G. 2001. Reproductive success does not decline in fragmented populations of *Leucochrysum albicans* subsp. *albicans* var. *tricolor* (Asteraceae). *Biol. Cons.*, **98**(3), 273–284.
- Dole, J., & Ritland, K. 1993. Inbreeding depression in two *Mimulus* taxa measured by multigenerational changes in the inbreeding coefficient. *Evolution*, **47**(2), 361–373.
- Doligez, A., & Joly, H. I. 1997. Mating system of *Carapa procera* (Meliaceae) in the French Guiana tropical forest. *Am. J. Bot.*, **84**(4), 461–470.
- Eckert, C. G., & Barrett, S. C. H. 1994. Inbreeding depression in partially self-fertilizing *Decodon verticillatus* (Lythraceae): Population-genetic and experimental analyses. *Evolution*, **48**(4), 952–964.

- El-Kassaby, Y. A., Meagher, M. D., Parkinson, J., & Portlock, F. T. 1987. Allozyme inheritance, heterozygosity and outcrossing rate among *Pinus monticola* near Ladysmith, British Columbia. *Heredity*, **58**, 173–181.
- Ellstrand, N. C., Torres, A. M., & Levin, D. A. 1978. Density and the rate of apparent outcrossing in *Helianthus annuus* (Asteraceae). *Syst. Bot.*, **3**(4), 403–407.
- Epperson, B. K., & Allard, R. W. 1984. Allozyme analysis of the mating system in lodgepole pine populations. *J. Hered.*, **75**(3), 212–214.
- Escalante, A. M., Coello, G., Eguiarte, L. E., & Pinero, D. 1994. Genetic structure and mating systems in wild and cultivated populations of *Phaseolus coccineus* and *Phaseolus vulgaris* (Fabaceae). *Am. J. Bot.*, **81**(9), 1096–1103.
- Farris, M. A., & Mitton, J. B. 1984. Population density, outcrossing rate, and heterozygote superiority in ponderosa pine. *Evolution*, **38**(5), 1151–1154.
- Finkeldey, R., De Guzman, N., & Changtragoon, S. 1999. The mating system of *Pterocarpus indicus* Willd. at Mt. Makiling, Philippines. *Biotropica*, **31**(3), 525–530.
- Franceschinelli, E. V., & Bawa, K. S. 2000. The effect of ecological factors on the mating system of a South American shrub species (*Helicteres brevispira*). *Heredity*, **84**(1), 116–123.
- Ge, X. J., & Sun, M. 1999. Reproductive biology and genetic diversity of a cryptoviviparous mangrove *Aegiceras corniculatum* (Myrsinaceae) using allozyme and intersimple sequence repeat (ISSR) analysis. *Mol. Ecol.*, **8**(12), 2061–2069.
- Goodwillie, C. 2000. Inbreeding depression and mating systems in two species of *Linanthus* (Polemoniaceae). *Heredity*, **84**(3), 283–293.



- Hall, P., Walker, S., & Bawa, K. 1996. Effect of forest fragmentation on genetic diversity and mating system in a tropical tree, *Pithecellobium elegans*. *Cons. Bio.*, **10**(3), 757–768.
- He, T.-H., Rao, G.-Y., You, R.-L., & Ge, S. 1998. Mating system of *Ophiopogon xylorrhizus* (Liliaceae), an endangered species in southwest China. *Int. J. Plant Sci.*, **159**(3), 440–445.
- Heywood, J. S., & Fleming, T. H. 1986. Patterns of allozyme variation in three Costa Rican species of *Piper*. *Biotropica*, **18**(3), 208–213.
- Hufford, K. M., & Hamrick, J. L. 2003. Viability selection at three early life stages of the tropical tree, *Platypodium elegans* (Fabaceae, Papilionoideae). *Evolution*, **57**(3), 518–526.
- Hughes, M., Hollingsworth, P. M., & Miller, A. G. 2003. Population genetic structure in the endemic *Begonia* of the Socotra archipelago. *Biol. Cons.*, **113**(2), 277–284.
- Johnston, M. O., & Schoen, D. J. 1996. Correlated evolution of self-fertilization and inbreeding depression: An experimental study of nine populations of *Amsinckia* (Boraginaceae). *Evolution*, **50**(4), 1478–1491.
- Kärkkäinen, K., Koski, V., & Savolainen, O. 1996. Geographical variation in the inbreeding depression of Scots pine. *Evolution*, **50**(1), 111–119.
- Keys, R. N., & Smith, S. E. 1994. Mating system parameters and population genetic structure in pioneer populations of *Prosopis velutina* (Leguminosae). *Am. J. Bot.*, **81**(8), 1013–1020.
- Kittelson, P. M., & Maron, J. L. 2000. Outcrossing rate and inbreeding depression in the perennial yellow bush lupine, *Lupinus arboreus* (Fabaceae). *Am. J. Bot.*, **87**(5), 652–660.
- Kittelson, P. M., & Maron, J. L. 2001. Fine-scale genetically based differentiation of life-history traits in the perennial shrub *Lupinus arboreus*. *Evolution*, **55**(12), 2429–2438.

- Konuma, A., Tsumura, Y., Lee, C. T., Lee, S. L., & Okuda, T. 2000. Estimation of gene flow in the tropical-rainforest tree *Neobalanocarpus heimii* (Dipterocarpaceae), inferred from paternity analysis. *Mol. Ecol.*, **9**(11), 1843–1852.
- Kuittinen, H., & Savolainen, O. 1992. *Picea omorika* is a self-fertile but outcrossing conifer. *Heredity*, **68**, 183–187.
- Ledig, F. T., Jacob-Cervantes, V., Hodgskiss, P. D., & Eguiluz-Piedra, T. 1997. Recent evolution and divergence among populations of a rare Mexican endemic, Chihuahua spruce, following Holocene climatic warming. *Evolution*, **51**(6), 1815–1827.
- Ledig, F. T., Bermejo-Velazquez, B., Hodgskiss, P. D., Johnson, D. R., Flores-Lopez, C., & Jacob-Cervantes, V. 2000. The mating system and genic diversity in Martinez spruce, an extremely rare endemic of Mexico's Sierra Madre Oriental: An example of facultative selfing and survival in interglacial refugia. *Can. J. For. Res.*, **30**(7), 1156–1164.
- Ledig, F. T., Capo-Arteaga, M. A., Hodgskiss, P. D., Sbay, H., Flores-Lopez, C., Conkle, M. T., & Bermejo-Velazquez, B. 2001. Genetic diversity and the mating system of a rare Mexican piñon, *Pinus pinceana*, and a comparison with *Pinus maximartinezii* (Pinaceae). *Am. J. Bot.*, **88**(11), 1977–1987.
- Lee, S. L., Wickneswari, R., Mahani, M. C., & Zakri, A. H. 2000. Mating system parameters in a tropical tree species, *Shorea leprosula* Miq. (Dipterocarpaceae), from Malaysian lowland dipterocarp forest. *Biotropica*, **32**(4), 693–702.
- Lee, S.-L., Ng, K. K.-S., Saw, L.-G., Norwati, A., Salwana, M. H. S., Lee, C.-T., & Norwati, M. 2002. Population genetics of *Intsia palembanica* (Leguminosae) and genetic conservation of virgin jungle reserves in peninsular Malaysia. *Am. J. Bot.*, **89**(3), 447–459.
- Lewandowski, A., & Burczyk, J. 2000. Mating system and genetic diversity in natural

- populations of European larch (*Larix decidua*) and stone pine (*Pinus cembra*) located at higher elevations. *Silv. Genet.*, **49**(3), 158–161.
- Lewandowski, A., Burczyk, J., & Mejnartowicz, L. 1991. Genetic structure and the mating system in an old stand of Polish Larch. *Silv. Genet.*, **40**(2), 75–79.
- Liengsiri, C., Boyle, T. J. B., & Yeh, F. C. 1998. Mating system in *Pterocarpus macrocarpus* Kurz in Thailand. *J. Hered.*, **89**(2), 216–221.
- Loveless, M. D., Hamrick, J. L., & Foster, R. B. 1998. Population structure and mating system in *Tachigali versicolor*, a monogamous neotropical tree. *Heredity*, **81**, 134–143.
- Matheson, A. C., Bell, J. C., & Barnes, R. D. 1989. Breeding systems and genetic structure in some Central American pine populations. *Silv. Genet.*, **38**(3-4), 107–113.
- Millar, M. A., Byrne, M., Coates, D. J., Stukely, M. J. C., & McComb, J. A. 2000. Mating system studies in jarrah, *Eucalyptus marginata* (Myrtaceae). *Aust. J. Bot.*, **48**(4), 475–479.
- Mitton, J. B., Latta, R. G., & Rehfeldt, G. E. 1997. The pattern of inbreeding in Washoe pine and survival of inbred progeny under optimal environmental conditions. *Silv. Genet.*, **46**(4), 215–219.
- Morgante, M., Vendramin, G. G., Rossi, P., & Olivieri, A. M. 1993. Selection against inbreds in early life-cycle phases in *Pinus leucodermis* Ant. *Heredity*, **70**, 622–627.
- Murawski, D. A. 1995. Reproductive biology and genetics of tropical trees from a canopy perspective. *Pages 457–493 of: Lowman, M. D., & Nadkarni, N. M. (eds), Forest Canopies.* San Diego, California: Academic Press.
- Murawski, D. A., & Bawa, K. S. 1994. Genetic structure and mating system of *Stemonoporus oblongifolius* (Dipterocarpaceae) in Sri Lanka. *Am. J. Bot.*, **81**(2), 155–160.

- Murawski, D. A., & Hamrick, J. L. 1991. The effect of the density of flowering individuals on the mating systems of nine tropical tree species. *Heredity*, **67**(2), 167–174.
- Murawski, D. A., & Hamrick, J. L. 1992. Mating system and phenology of *Ceiba pentandra* (Bombacaceae) in central Panama. *J. Hered.*, **83**(6), 401–404.
- Murawski, D. A., Hamrick, J. L., Hubbell, S. P., & Foster, R. B. 1990. Mating systems of two bombacaceous trees of a Neotropical moist forest. *Oecologia*, **82**(4), 501–506.
- Murawski, D. A., Nimal Gunatilleke, I. A. U., & Bawa, K. S. 1994a. The effects of selective logging on inbreeding in *Shorea megistophylla* (Dipterocarpaceae) from Sri Lanka. *Cons. Bio.*, **8**(4), 997–1002.
- Murawski, D. A., Dayanandan, B., & Bawa, K. S. 1994b. Outcrossing rates of two endemic *Shorea* species from Sri Lankan tropical rain forests. *Biotropica*, **26**(1), 23–29.
- Neel, M. C., Ross-Ibarra, J., & Ellstrand, N. C. 2001. Implications of mating patterns for conservation of the endangered plant *Eriogonum ovalifolium* var. *vineum* (Polygonaceae). *Am. J. Bot.*, **88**(7), 1214–1222.
- O'Malley, D. M., & Bawa, K. S. 1987. Mating system of a tropical rain forest tree species. *Am. J. Bot.*, **74**(8), 1143–1149.
- O'Malley, D. M., Buckley, D. P., Prance, G. T., & Bawa, K. S. 1988. Genetics of Brazil nut (*Bertholletia excelsa* Humb. & Bonpl.: Lecythidaceae). 2. Mating system. *Theor. Appl. Genet.*, **76**(6), 929–932.
- Pascarella, J. B. 1997. The mating system of the tropical understory shrub *Ardisia escallonioides* (Myrsinaceae). *Am. J. Bot.*, **84**(4), 456–460.
- Perry, D. J., & Knowles, P. 1990. Evidence of high self-fertilization in natural populations of Eastern White Cedar (*Thuja occidentalis*). *Can. J. Bot.*, **68**(3), 663–668.

- Rajora, O. P., Mosseler, A., & Major, J. E. 2002. Mating system and reproductive fitness traits of eastern white pine (*Pinus strobus*) in large, central versus small, isolated, marginal populations. *Can. J. Bot.*, **80**(11), 1173–1184.
- Ritland, K., & Ganders, F. R. 1987. Covariation of selfing rates with parental gene fixation indexes within populations of *Mimulus guttatus*. *Evolution*, **41**(4), 760–771.
- Rocha, O. J., & Aguilar, G. 2001. Variation in the breeding behavior of the dry forest tree *Enterolobium cyclocarpum* (Guanacaste) in Costa Rica. *Am. J. Bot.*, **88**(9), 1600–1606.
- Routley, M. B., Mavraganis, K., & Eckert, C. G. 1999. Effect of population size on the mating system in a self-compatible, autogamous plant, *Aquilegia canadensis* (Ranunculaceae). *Heredity*, **82**, 518–528.
- Sakai, A. K., Weller, S. G., Chen, M. L., Chou, S. Y., & Tسانont, C. 1997. Evolution of gynodioecy and maintenance of females: The role of inbreeding depression, outcrossing rates, and resource allocation in *Schiedea adamantis* (Caryophyllaceae). *Evolution*, **51**(3), 724–736.
- Sampson, J. F., Hopper, S. D., & James, S. H. 1989. The mating system and population genetic structure in a bird-pollinated mallee, *Eucalyptus rhodantha*. *Heredity*, **63**, 383–393.
- Schmidt-Adam, G., Young, A. G., & Murray, B. G. 2000. Low outcrossing rates and shift in pollinators in New Zealand pohutukawa (*Metrosideros excelsa*; Myrtaceae). *Am. J. Bot.*, **87**(9), 1265–1271.
- Schoen, D. J. 1982. The breeding system of *Gilia achilleifolia*: Variation in floral characteristics and outcrossing rate. *Evolution*, **36**(2), 352–360.
- Schoen, D. J., & Brown, A. H. D. 1991. Whole-flower and part-flower self-pollination in

- Glycine clandestina* and *G. argyrea* and the evolution of autogamy. *Evolution*, **45**(7), 1651–1664.
- Shaw, D. V., & Allard, R. W. 1982a. Estimation of outcrossing rates in Douglas Fir using isozyme markers. *Theor. Appl. Genet.*, **62**(2), 113–120.
- Shaw, D. V., & Allard, R. W. 1982b. Isozyme heterozygosity in adult and open-pollinated embryo samples of Douglas Fir. *Silv. Fenn.*, **16**, 115–121.
- Shea, K. L. 1987. Effects of population structure and cone production on outcrossing rates in Engelmann Spruce and Sub-Alpine Fir. *Evolution*, **41**(1), 124–136.
- Sproule, A. T., & Dancik, B. P. 1996. The mating system of Black Spruce in north-central Alberta, Canada. *Silv. Genet.*, **45**(2-3), 159–164.
- Sun, M., Wong, K. C., & Lee, J. S. Y. 1998. Reproductive biology and population genetic structure of *Kandelia candel* (Rhizophoraceae), a viviparous mangrove species. *Am. J. Bot.*, **85**(11), 1631–1637.
- Williams, C. F., Ruvinsky, J., Scott, P. E., & Hews, D. K. 2001. Pollination, breeding system, and genetic structure in two sympatric *Delphinium* (Ranunculaceae) species. *Am. J. Bot.*, **88**(9), 1623–1633.
- Xie, C. Y., Dancik, B. P., & Yeh, F. C. 1991. The mating system in natural populations of *Thuja orientalis*. *Can. J. For. Res.*, **21**(3), 333–339.
- Young, A. G., Hill, J. H., Murray, B. G., & Peakall, R. 2002. Breeding system, genetic diversity and clonal structure in the sub-alpine forb *Rutidosia leiolepis* F. Muell. (Asteraceae). *Biol. Cons.*, **106**(1), 71–78.
